# Supplementary material for: How Much Participant Outcome Data Is Missing from Sight: Findings from a Cohort of Trials Submitted to a German Research Ethics Committee
Source: PLoS One. 2016 Jun 17;11(6):e0157883. doi: 10.1371/journal.pone.0157883 (PMC4912080; doi:10.1371/journal.pone.0157883)
Supplement: S1 File — (XLSX) [file pone.0157883.s001.xlsx]

## Sheet: Formulas
k = ku+kp	number of trials in cohort			308
ku	unpublished with outcomes extracted excluding never started			141
kp	published			167
ni	number of individuals randomised in trial i
mi =mp+mu	number of outcomes in trial
mp	published outcomes
mu	unpublished outcomes
		Analysis 1 (including partial with unpublished)		Analysis 2 (including partial with published)
sum(n*m) for i=1 to k	Total amount of data	2618116	[A]	2618116
sum(n*mp) for i=1 to kp	Total amount of published data	1233291	[B]	2126183	892892	[C]
sum(n*mu) for i=1 to kp + sum(n*m) for i=p+1 to kp+ku	Total amount of unpublished data	1384825		491933
a12/a10	Ratio of unpublished data	0.52894		0.187896
a11/a10	Ratio of published data	0.47106		0.812104
	ORB	0.375947		0.0349033
	pub bias	0.152992		0.152992
assumptions made	unpublished studies - use of sample size in protocol
	published studies - ignoring timepoints, taking highest order of reporting as the one used
	published studies - use of actual sample size and use of largest in multiple publications

## Sheet: published
														Treating partial as unpublished
study ID	n	m	mp	mu	partial		nm	nmp	tot par	tot miss		n*(mu+partial)		n*(mp+partial)	nmu			Commercial Funding	Non-commerical funding
1	228	17	12	1	4		3876	2736	912	228		1140		3648	228		00-002	0	0
2	1222	12	10	2	0		14664	12220	0	2444		2444		12220	2444		00-004	1	0
3	1308	9	8	0	1		11772	10464	1308	0		1308		11772	0		00-005	0	1
4	89	14	13	0	1		1246	1157	89	0		89		1246	0		00-012	1	0
5	26	3	3	0	0		78	78	0	0		0		78	0		00-013	1	0
6	72	7	2	1	4		504	144	288	72		360		432	72		00-014	0	0
7	202	14	10	2	2		2828	2020	404	404		808		2424	404		00-016	1	0
8	399	11	7	0	4		4389	2793	1596	0		1596		4389	0		00-019	1	0
9	31	10	6	0	4		310	186	124	0		124		310	0		00-021	1	0
10	88	16	12	0	4		1408	1056	352	0		352		1408	0		00-028	1	0
11	301	17	0	6	11		5117	0	3311	1806		5117		3311	1806		00-034	0	1
12	502	20	17	1	2		10040	8534	1004	502		1506		9538	502		00-046	1	0
13	12	31	0	0	31		372	0	372	0		372		372	0		00-047	0	0
14	688	9	8	0	1		6192	5504	688	0		688		6192	0		00-049	0	0
15	15	30	19	0	11		450	285	165	0		165		450	0		00-054	0	0
16	125	7	2	0	5		875	250	625	0		625		875	0		00-067	1	0
17	703	33	21	1	11		23199	14763	7733	703		8436		22496	703		00-068	1	0
18	186	10	6	2	2		1860	1116	372	372		744		1488	372		00-076	1	0
19	502	13	13	0	0		6526	6526	0	0		0		6526	0		00-105	1	0
20	161	18	17	1	0		2898	2737	0	161		161		2737	161		00-108	1	0
21	500	10	6	1	3		5000	3000	1500	500		2000		4500	500		00-115	1	0
22	98	7	4	0	3		686	392	294	0		294		686	0		00-116	1	0
23	238	48	36	4	8		11424	8568	1904	952		2856		10472	952		00-127	1	0
24	323	14	1	0	13		4522	323	4199	0		4199		4522	0		00-132	1	0
25	239	16	12	0	4		3824	2868	956	0		956		3824	0		00-133	1	0
26	1123	14	11	1	2		15722	12353	2246	1123		3369		14599	1123		00-135	1	0
27	939	10	6	1	3		9390	5634	2817	939		3756		8451	939		00-141	1	0
28	3407	6	6	0	0		20442	20442	0	0		0		20442	0		00-147	1	0
29	82	21	13	0	8		1722	1066	656	0		656		1722	0		00-152	1	0
30	1199	18	2	0	16		21582	2398	19184	0		19184		21582	0		00-155	1	0
31	109	7	5	0	2		763	545	218	0		218		763	0		00-165	1	0
32	28	2	1	0	1		56	28	28	0		28		56	0		00-168	1	0
33	318	6	2	1	3		1908	636	954	318		1272		1590	318		00-173	0	0
34	143	9	8	0	1		1287	1144	143	0		143		1287	0		00-174	1	0
35	243	18	14	0	4		4374	3402	972	0		972		4374	0		00-182	0	1
36	459	8	4	0	4		3672	1836	1836	0		1836		3672	0		00-185	1	0
37	799	16	13	0	3		12784	10387	2397	0		2397		12784	0		00-189	1	0
38	3298	3	3	0	0		9894	9894	0	0		0		9894	0		00-195	1	0
39	972	20	13	1	6		19440	12636	5832	972		6804		18468	972		00-198	1	0
40	46	4	4	0	0		184	184	0	0		0		184	0		00-204	0	1
41	162	15	11	1	3		2430	1782	486	162		648		2268	162		00-209	1	0
42	238	2	2	0	0		476	476	0	0		0		476	0		00-210	1	0
43	56	10	8	1	1		560	448	56	56		112		504	56		00-213	1	0
44	347	15	5	5	5		5205	1735	1735	1735		3470		3470	1735		00-217	1	0
45	84	4	3	1	0		336	252	0	84		84		252	84		00-218	1	0
46	630	12	9	0	3		7560	5670	1890	0		1890		7560	0		00-219	0	0
47	147	6	4	1	1		882	588	147	147		294		735	147		00-222	1	0
48	354	10	10	0	0		3540	3540	0	0		0		3540	0		00-230	1	0
49	3297	25	14	0	11		82425	46158	36267	0		36267		82425	0		00-239	1	0
50	36	7	1	0	6		252	36	216	0		216		252	0		00-250	0	1
51	63	18	12	0	6		1134	756	378	0		378		1134	0		00-256	1	0
52	1987	7	4	0	3		13909	7948	5961	0		5961		13909	0		00-257	1	0
53	210	10	9	0	1		2100	1890	210	0		210		2100	0		00-260	1	0
54	21	5	2	2	1		105	42	21	42		63		63	42		00-264	1	0
55	67	5	0	1	4		335	0	268	67		335		268	67		00-269	1	0
56	2528	8	6	1	1		20224	15168	2528	2528		5056		17696	2528		00-270	1	0
57	573	8	6	2	0		4584	3438	0	1146		1146		3438	1146		00-287	0	1
58	68	7	7	0	0		476	476	0	0		0		476	0		00-289	1	0
59	202	15	13	2	0		3030	2626	0	404		404		2626	404		00-294	1	0
60	364	2	2	0	0		728	728	0	0		0		728	0		00-304	0	1
61	54	10	3	3	4		540	162	216	162		378		378	162		00-307	0	1
62	103	5	0	4	1		515	0	103	412		515		103	412		00-310	0	1
63	203	7	5	1	1		1421	1015	203	203		406		1218	203		00-317	0	1
64	767	14	10	4	0		10738	7670	0	3068		3068		7670	3068		01-002	0	0
65	57	9	8	1	0		513	456	0	57		57		456	57		01-006	1	0
66	7599	18	12	5	1		136782	91188	7599	37995		45594		98787	37995		01-007	1	0
67	687	26	18	0	8		17862	12366	5496	0		5496		17862	0		01-012	1	0
68	145	10	7	1	2		1450	1015	290	145		435		1305	145		01-013	1	0
69	215	10	9	0	1		2150	1935	215	0		215		2150	0		01-017	1	0
70	545	32	26	1	5		17440	14170	2725	545		3270		16895	545		01-045	1	0
71	443	12	3	0	9		5316	1329	3987	0		3987		5316	0		01-047	1	0
72	125	14	14	0	0		1750	1750	0	0		0		1750	0		01-052	1	0
73	127	12	5	6	1		1524	635	127	762		889		762	762		01-053	1	0
74	411	5	2	1	2		2055	822	822	411		1233		1644	411		01-060	0	0
75	20	2	0	0	2		40	0	40	0		40		40	0		01-071	0	0
76	621	13	13	0	0		8073	8073	0	0		0		8073	0		01-073	1	0
77	538	9	8	0	1		4842	4304	538	0		538		4842	0		01-084	1	0
78	995	6	4	0	2		5970	3980	1990	0		1990		5970	0		01-086	1	0
79	244	8	4	0	4		1952	976	976	0		976		1952	0		01-094	1	0
80	89	3	3	0	0		267	267	0	0		0		267	0		01-099	1	0
81	162	14	11	0	3		2268	1782	486	0		486		2268	0		01-119	1	0
82	240	10	10	0	0		2400	2400	0	0		0		2400	0		01-121	0	0
83	16	14	12	0	2		224	192	32	0		32		224	0		01-128	0	0
84	196	15	11	0	4		2940	2156	784	0		784		2940	0		01-136	1	0
85	108	8	8	0	0		864	864	0	0		0		864	0		01-137	0	0
86	23	9	4	2	3		207	92	69	46		115		161	46		01-141	0	0
87	170	8	6	0	2		1360	1020	340	0		340		1360	0		01-147	1	0
88	2187	16	15	0	1		34992	32805	2187	0		2187		34992	0		01-155	1	0
89	3161	20	18	0	2		63220	56898	6322	0		6322		63220	0		01-160	1	0
90	710	13	8	0	5		9230	5680	3550	0		3550		9230	0		01-169	1	0
91	2681	15	11	4	0		40215	29491	0	10724		10724		29491	10724		01-173	1	0
92	40	6	0	0	6		240	0	240	0		240		240	0		01-174	0	0
93	225	3	3	0	0		675	675	0	0		0		675	0		01-175	1	0
94	2229	15	11	0	4		33435	24519	8916	0		8916		33435	0		01-177	1	0
95	572	8	4	0	4		4576	2288	2288	0		2288		4576	0		01-178	1	0
96	59	5	5	0	0		295	295	0	0		0		295	0		01-187	0	1
97	71	10	0	0	10		710	0	710	0		710		710	0		01-190	0	1
98	96	21	0	0	21		2016	0	2016	0		2016		2016	0		01-191	0	1
99	140	12	11	0	1		1680	1540	140	0		140		1680	0		01-195	1	0
100	762	5	0	2	3		3810	0	2286	1524		3810		2286	1524		01-197	1	0
101	43	21	11	0	10		903	473	430	0		430		903	0		01-201	0	1
102	1079	22	8	0	14		23738	8632	15106	0		15106		23738	0		01-202	1	0
103	85	11	8	1	2		935	680	170	85		255		850	85		01-210	1	0
104	5199	1	0	1	0		5199	0	0	5199		5199		0	5199		01-211	1	0
105	5761	10	10	0	0		57610	57610	0	0		0		57610	0		01-217	1	0
106	658	15	10	0	5		9870	6580	3290	0		3290		9870	0		01-220	1	0
107	37	2	2	0	0		74	74	0	0		0		74	0		01-223	0	0
108	122	17	9	0	8		2074	1098	976	0		976		2074	0		01-229	1	0
109	90	26	22	0	4		2340	1980	360	0		360		2340	0		01-230	1	0
110	809	24	21	2	1		19416	16989	809	1618		2427		17798	1618		01-239	1	0
111	32	6	6	0	0		192	192	0	0		0		192	0		01-241	0	0
112	1222	31	27	0	4		37882	32994	4888	0		4888		37882	0		01-248	0	1
113	305	2	0	0	2		610	0	610	0		610		610	0		01-298	1	0
114	203	7	5	0	2		1421	1015	406	0		406		1421	0		01-331	0	0
115	400	11	11	0	0		4400	4400	0	0		0		4400	0		01-337	1	0
116	629	9	7	0	2		5661	4403	1258	0		1258		5661	0		02-003	1	0
117	20	1	0	0	1		20	0	20	0		20		20	0		02-006	1	0
118	20	9	9	0	0		180	180	0	0		0		180	0		02-007	1	0
119	92	15	11	0	4		1380	1012	368	0		368		1380	0		02-027	0	1
120	5102	10	10	0	0		51020	51020	0	0		0		51020	0		02-031	1	0
121	9999	25	19	0	6		249975	189981	59994	0		59994		249975	0		02-032	0	1
122	6	2	2	0	0		12	12	0	0		0		12	0		02-035	1	0
123	436	9	8	0	1		3924	3488	436	0		436		3924	0		02-038	1	0
124	340	15	9	0	6		5100	3060	2040	0		2040		5100	0		02-043	0	0
125	105	52	39	1	12		5460	4095	1260	105		1365		5355	105		02-046	0	0
126	207	19	11	1	7		3933	2277	1449	207		1656		3726	207		02-047	1	0
127	99999	6	0	0	6		599994	0	599994	0		599994		599994	0		02-068	0	0
128	438	17	15	0	2		7446	6570	876	0		876		7446	0		02-074	1	0
129	90	12	10	0	2		1080	900	180	0		180		1080	0		02-075	0	0
130	29	5	0	0	5		145	0	145	0		145		145	0		02-080	0	0
131	22	4	0	0	4		88	0	88	0		88		88	0		02-086	0	0
132	24	4	3	0	1		96	72	24	0		24		96	0		02-088	1	0
133	123	13	12	0	1		1599	1476	123	0		123		1599	0		02-112	1	0
134	2452	29	28	0	1		71108	68656	2452	0		2452		71108	0		02-125	1	0
135	421	15	9	4	2		6315	3789	842	1684		2526		4631	1684		02-127	1	0
136	144	7	7	0	0		1008	1008	0	0		0		1008	0		02-148	1	0
137	1172	17	13	1	3		19924	15236	3516	1172		4688		18752	1172		02-166	1	0
138	500	25	25	0	0		12500	12500	0	0		0		12500	0		02-167	1	0
139	273	6	4	0	2		1638	1092	546	0		546		1638	0		02-169	1	0
140	40	7	6	0	1		280	240	40	0		40		280	0		02-180	1	0
141	55	10	10	0	0		550	550	0	0		0		550	0		02-192	0	1
142	2159	16	16	0	0		34544	34544	0	0		0		34544	0		02-196	1	0
143	10	24	21	2	1		240	210	10	20		30		220	20		02-203	0	0
144	60	0	0	0	0		0	0	0	0		0		0	0		02-206	1	0
145	104	11	9	0	2		1144	936	208	0		208		1144	0		02-207	1	0
146	146	34	26	1	7		4964	3796	1022	146		1168		4818	146		02-213	1	0
147	205	23	10	6	7		4715	2050	1435	1230		2665		3485	1230		02-214	1	0
148	569	13	11	1	1		7397	6259	569	569		1138		6828	569		02-218	1	0
149	861	7	7	0	0		6027	6027	0	0		0		6027	0		02-232	1	0
150	75	7	6	1	0		525	450	0	75		75		450	75		02-236	0	0
151	100	15	12	2	1		1500	1200	100	200		300		1300	200		02-237	1	0
152	202	24	23	0	1		4848	4646	202	0		202		4848	0		02-238	1	0
153	129	19	9	3	7		2451	1161	903	387		1290		2064	387		02-247	1	0
154	507	9	8	0	1		4563	4056	507	0		507		4563	0		02-258	1	0
155	2072	11	11	0	0		22792	22792	0	0		0		22792	0		02-259	0	1
156	622	39	39	0	0		24258	24258	0	0		0		24258	0		02-259b	0	1
157	60	21	21	0	0		1260	1260	0	0		0		1260	0		02-263	1	0
158	279	26	23	1	2		7254	6417	558	279		837		6975	279		02-271	1	0
159	43	40	40	0	0		1720	1720	0	0		0		1720	0		02-283	1	0
160	1044	11	10	1	0		11484	10440	0	1044		1044		10440	1044		02-284	1	0
161	457	40	20	0	20		18280	9140	9140	0		9140		18280	0		02-292	1	0
162	93	45	31	11	3		4185	2883	279	1023		1302		3162	1023		02-294	1	0
163	383	8	3	1	4		3064	1149	1532	383		1915		2681	383		02-300	1	0
164	20	20	20	0	0		400	400	0	0		0		400	0		02-311	0	0
165	47	7	1	2	4		329	47	188	94		282		235	94		02-316b	1	0
166	368	19	8	5	6		6992	2944	2208	1840		4048		5152	1840		02-319	0	0
167	100	14	13	1	0		1400	1300	0	100		100		1300	100		02-353	1	0
							2217564	1233291				984273		2126183	91381	[D]
							ALL DATA	PUBLISHED				UNPUBLISHED PLUS PARTIAL		PUBLISHED PLUS PARTIAL	UNPUBLISHED

## Sheet: unpublished
study protocol ID	n	m	nm			Commercial Funding	Non-commerical funding
1	1435	8	11480		1	1	0
2	152	4	608		2	0	0
3	900	4	3600		3	0	0
4	220	11	2420		4	1	0
5	650	8	5200		5	1	0
6	9300	5	46500		6	1	0
7	150	11	1650		7	0	0
8	30	15	450		8	1	0
9	180	12	2160		9	1	0
10	200	1	200		10	0	0
11	200	6	1200		11	1	0
12	100	1	100		12	1	0
13	200	14	2800		13	1	0
14	40	12	480		14	1	0
15	84	20	1680		15	0	0
16	1000	11	11000		16	1	0
17	304	10	3040		17	1	0
18	288	3	864		18	1	0
19	180	3	540		19	0	1
20	250	7	1750		20	1	0
21	78	15	1170		21	1	0
22	884	3	2652		22	0	0
23	60	4	240		23	0	0
24	20	5	100		24	1	0
25	120	8	960		25	1	0
26	700	10	7000		26	0	1
27	225	4	900		27	1	0
28	104	7	728		28	1	0
29	472	6	2832		29	0	0
30	300	6	1800		30	1	0
31	250	3	750		31	0	0
32	426	11	4686		32	1	0
33	100	14	1400		33	1	0
34	22	7	154		34	1	0
35	60	4	240		35	1	0
36	460	12	5520		36	1	0
37	625	3	1875		37	0	0
38	120	3	360		38	0	1
39	300	15	4500		39	0	0
40	30	11	330		40	1	0
41	400	3	1200		41	0	0
42	3150	8	25200		42	1	0
43	246	10	2460		43	1	0
44	32	2	64		44	1	0
45	208	5	1040		45	1	0
46	420	20	8400		46	0	0
47	260	17	4420		47	1	0
48	600	20	12000		48	1	0
49	220	7	1540		49	0	1
50	100	15	1500		50	1	0
51	20	9	180		51	1	0
52	180	14	2520		52	1	0
53	538	15	8070		53	1	0
54	90	6	540		54	1	0
55	80	15	1200		55	0	0
56	80	16	1280		56	1	0
57	390	11	4290		57	1	0
58	100	8	800		58	1	0
59	282	11	3102		59	1	0
60	270	6	1620		60	0	0
61	50	8	400		61	0	0
62	6	2	12		62	0	1
63	170	13	2210		63	1	0
64	1000	6	6000		64	1	0
65	700	8	5600		65	1	0
66	228	30	6840		66	0	0
67	612	10	6120		67	1	0
68	20	4	80		68	1	0
69	110	11	1210		69	1	0
70	80	5	400		70	1	0
71	120	9	1080		71	1	0
72	200	4	800		72	0	0
73	900	14	12600		73	1	0
74	210	19	3990		74	1	0
75	24	2	48		75	0	0
76	130	6	780		76	0	1
77	240	12	2880		77	0	1
78	130	9	1170		78	0	0
79	120	7	840		79	0	0
80	20	6	120		80	0	0
81	35	2	70		81	0	1
82	190	6	1140		82	1	0
83	225	5	1125		83	0	1
84	378	10	3780		84	1	0
85	40	11	440		85	1	0
86	220	5	1100		86	1	0
87	1716	6	10296		87	0	0
88	10	4	40		88	0	0
89	30	5	150		89	0	1
90	720	16	11520		90	0	0
91	190	12	2280		91	1	0
92	330	6	1980		92	0	1
93	60	7	420		93	0	0
94	16	19	304		94	1	0
95	1520	11	16720		95	1	0
96	10	2	20		96	0	0
97	640	6	3840		97	1	0
98	40	4	160		98	0	0
99	24	3	72		99	0	0
100	100	6	600		100	1	0
101	20	2	40		101	0	0
102	400	6	2400		102	0	1
103	144	4	576		103	0	1
104	200	5	1000		104	0	1
105	200	3	600		105	0	0
106	48	4	192		106	0	0
107	100	15	1500		107	0	0
108	600	17	10200		108	1	0
109	24	4	96		109	1	0
110	60	10	600		110	0	1
111	132	8	1056		111	1	0
112	20	11	220		112	1	0
113	150	12	1800		113	1	0
114	1074	4	4296		114	1	0
115	80	4	320		115	0	0
116	70	11	770		116	1	0
117	300	12	3600		117	1	0
118	290	4	1160		118	1	0
119	30	8	240		119	0	0
120	280	10	2800		120	1	0
121	50	6	300		121	0	0
122	120	14	1680		122	1	0
123	50	2	100		123	0	0
124	105	4	420		124	0	0
125	380	14	5320		125	1	0
126	240	7	1680		126	1	0
127	10	3	30		127	1	0
128	60	3	180		128	0	1
129	1912	4	7648		129	0	1
130	320	5	1600		130	0	1
131	120	10	1200		131	0	1
132	90	3	270		132	0	0
133	10	2	20		133	0	0
134	450	13	5850		134	1	0
135	250	5	1250		135	1	0
136	100	2	200		136	0	0
137	100	2	200		137	0	1
138	340	5	1700		138	1	0
139	750	11	8250		139	1	0
140	154	14	2156		140	1	0
141	90	5	450		141	0	0
			304446	400552	[E]
